# Supplementary material for: Synergism of Photo-Induced Electron Transfer and Aggregation-Induced Quenching Mechanisms for Highly Sensitive Detection of Silver Ion and Captopril
Source: MDPI journal article supplement (doi:10.3390/molecules28093650), 2023-04-22
Supplement: s1 [file s1]

## Supporting Information

For

# Synergism of Photo-Induced Electron Transfer and Aggregation-Induced Quenching Mechanisms for Highly Sensitive Detection of Silver Ion and Captopril

Jing Zhu <sup>1</sup>, Lei Hu <sup>1</sup>, Xiangying Meng <sup>2,\*</sup>, Feng Li <sup>1</sup>, Wenjuan Wang <sup>1</sup>, Guiyang Shi <sup>1</sup> and Zhongxia Wang <sup>1,\*</sup>

<sup>1</sup> School of Chemistry and Chemical Engineering, Yancheng Institute of Technology, Yancheng 224051, China

<sup>2</sup> School of Medical Laboratory, Weifang Medical University, Weifang 261053, China

\* Correspondence: mengxy2015@wfmc.edu.cn (X.M.); angzx198411@nju.edu.cn (Z.W.)

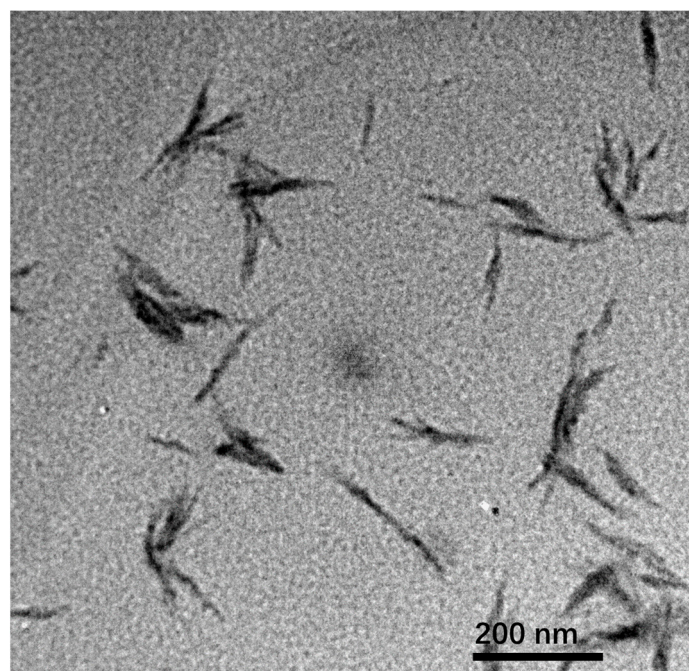

**Figure S1** Enlarged-TEM image of ONCNs.

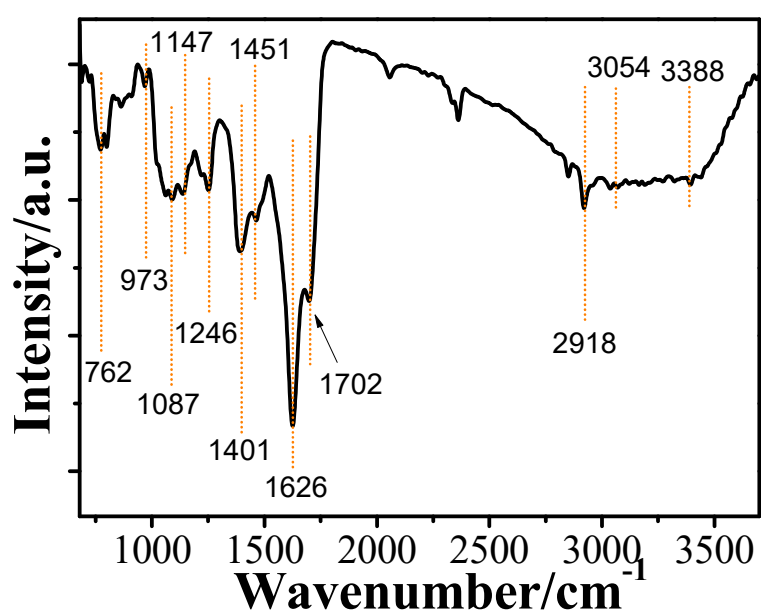

**Figure S2** FT-IR spectrum of ONCNs.

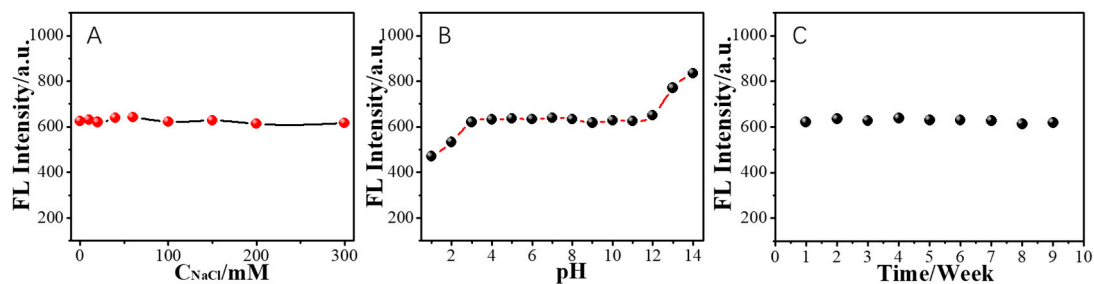

**Figure S3** FL intensity at 390 nm (excitation at 335 nm) of the ONCNs as a function of A) NaCl concentration, B) solution pH value, and C) storage time. the excitation and emission slit widths were 5 nm and 3 nm, respectively.

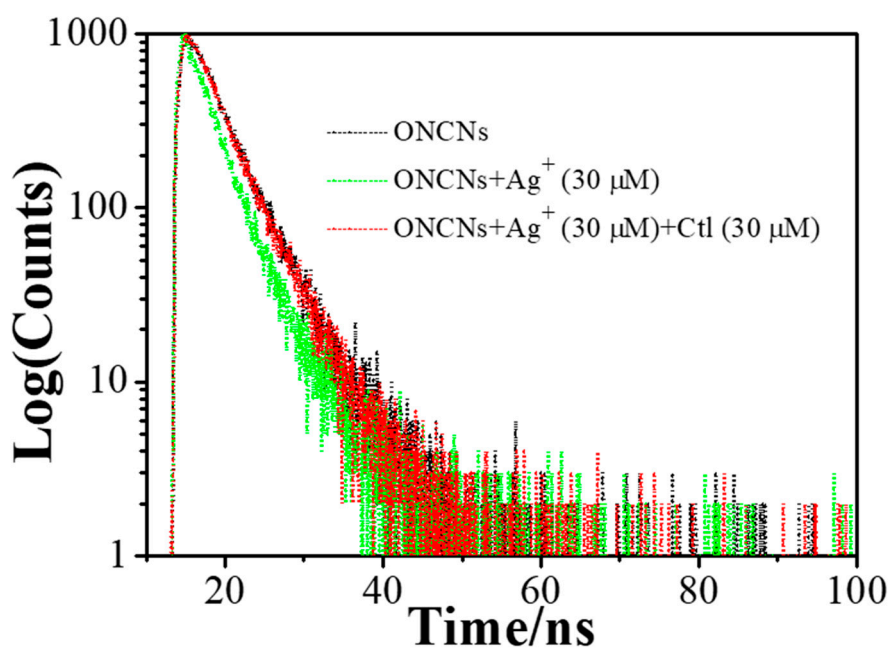

**Figure S4** Decay of the FL of the ONCNs in the absence and presence of Ag<sup>+</sup> (30 μM) or Ag<sup>+</sup> (30 μM) and Ctl (30 μM).

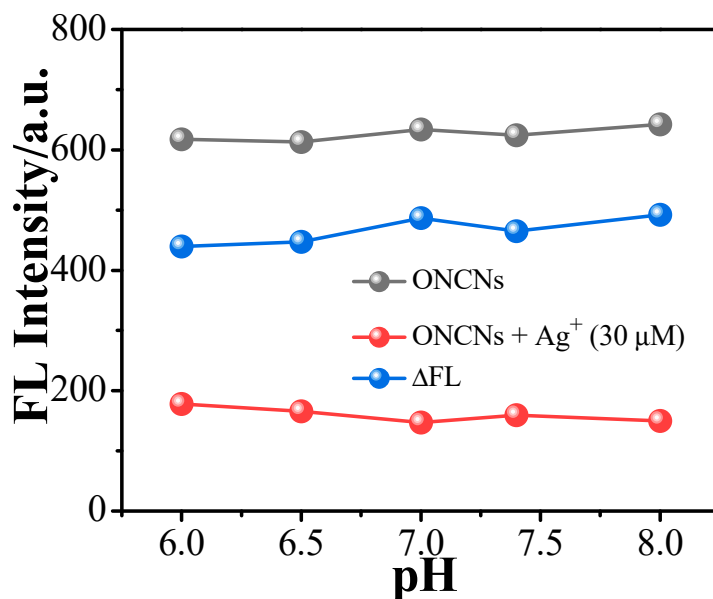

**Figure S5** The FL intensity of the ONCNs ( $10 \mu\text{g mL}^{-1}$ ) in different pH values of Tris- $\text{HNO}_3$  buffer solution in the absence or presence of  $\text{Ag}^+$  ions ( $30 \mu\text{M}$ ).

As shown Figure S5 (blue line), it can clearly be seen that the relative FL of ONCNs efficiency increased gradually as the pH increased from 6.0 to 7.0, then, the relative FL value decreased gradually as the pH increased from 7.0 to 8.0. This would mean that there would be strong interactions between the  $\text{Ag}^+$  ion and the ONCNs at acid-base solution, meaning that  $\text{Ag}^+$  ion would decrease the FL of the ONCNs efficiently. On the other hand,  $\text{Ag}^+$  ion can complex with  $\text{OH}^-$  to form the insoluble hydrated oxide  $\text{Ag}(\text{OH})$  under strong alkaline conditions, preventing coordination of  $\text{Ag}^+$  ion to the ONCNs, leading to incomplete FL quenching due to the suppression of ONCNs- $\text{Ag}^+$  aggregate formation. Considering the protonation-deprotonation of the ONCNs and the stable effect of the  $\text{Ag}^+$  ion for pH values, pH 7.0 Tris- $\text{HNO}_3$  buffer was selected as the optimum solvent for sensor performance.

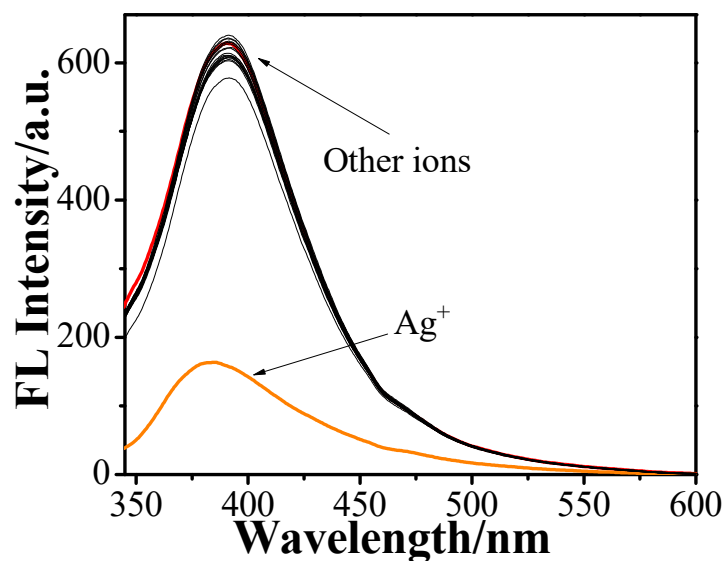

**Figure S6** FL spectra of ONCNs in the presence of various metal ions. The concentration of  $\text{Ag}^+$  ions were 30  $\mu\text{M}$ , that of  $\text{Hg}^{2+}$  was 50  $\mu\text{M}$ , and those of the other metal ions were 500  $\mu\text{M}$ . Excitation/emission wavelengths at 335/390 nm, and both the excitation and emission slit widths were 5 nm and 3 nm, respectively.

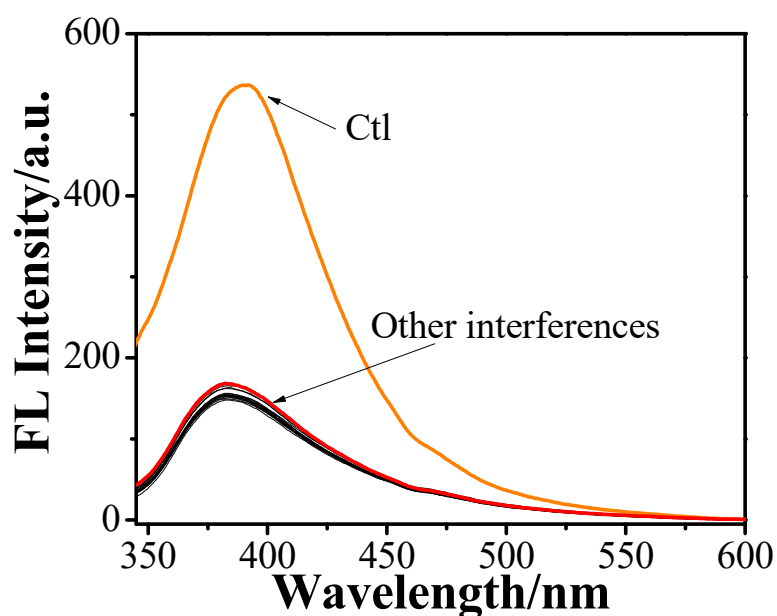

**Figure S7** FL spectra of ONCNs- $\text{Ag}^+$ -based in the presence of various biomolecules. The concentration of Ctl was 30  $\mu\text{M}$ , that of dopamine, adrenaline and serotonin were 50  $\mu\text{M}$ , respectively, and those of the other biomolecules were 500  $\mu\text{M}$ . Excitation/emission wavelengths at 335/390 nm, and both the excitation and emission slit widths were 5 nm and 3 nm, respectively.

Table S1. Comparison of different methods and/or probes for Ag<sup>+</sup> ion determination.

| Analyte             | Methods      | Probe         | Linear range  | Detect limit | Refs.      |
|---------------------|--------------|---------------|---------------|--------------|------------|
| Ag <sup>+</sup> ion | Fluorescence | FITC-CdTe QDs | 0.125-12.5 μM | 40 nM        | [1]        |
| Ag <sup>+</sup> ion | Fluorescence | BSA-Au NCs    | 5.0 - 60.0 μM | 0.23 μM      | [2]        |
| Ag <sup>+</sup> ion | Fluorescence | CDs           | 5 - 100 μM    | 1.40 μM      | [3]        |
| Ag <sup>+</sup> ion | Fluorescence | ONCNs         | 3 - 30 μM     | 0.78 μM      | Our method |

Table S2. Comparison of different methods and/or probes for Ctl determination.

| Analyte | Methods      | Probe    | Linear range | Detect limit | Refs.      |
|---------|--------------|----------|--------------|--------------|------------|
| Ctl     | Fluorescence | PCNBPs   | 0.05 - 40 μM | 15.9 nM      | [4]        |
| Ctl     | Fluorescence | MoOx QDs | 1 - 40 μM    | 0.51 μM      | [5]        |
| Ctl     | Fluorescence | B,N-CQDs | 0.1 - 60 μM  | 30 nM        | [6]        |
| Ctl     | Fluorescence | ONCNs    | 1 - 30 μM    | 74 nM        | Our method |

## References

1. Ting Liu, Li-Xing Fu, Chen-Hui Yin, Meng Wu, Li-Gang Chen, Na Niu, Design of smartphone platform by ratiometric fluorescent for visual detection of silver ions, *Microchemical Journal*, 2022, 174, 107016.
2. Zheng-Fen Pu, Jun Peng, Qiu-Lin Wen, Yu Li, Jian Ling, Peng Liu, Qiu-E Cao, Photocatalytic synthesis of BSA-Au nanoclusters with tunable fluorescence for highly selective detection of silver ion, *Dyes and Pigments*, 2021, 193, 109533.
3. Yun-Xia Ma, Wen-Juan Lv, Yong-Lei Chen, Min Na, Juan-Juan Liu, Yang-Xia Han, Su-Dai Ma, Xing-Guo Chen, Facile preparation of orange-emissive carbon dots for the highly selective detection of silver ions, 2019, *New Journal of Chemistry*, 43, 5070-5076.
4. Zhong-Xia Wang, Yuan-Fei Gao, Xian-He Yu, Fen-Ying Kong, Wei-Xin Lv, Wei Wang, Photoluminescent coral-like carbon-branched polymers as nanoprobe for fluorometric determination of captopril, *Microchimica Acta*, 2018, 9, 185.

5. Sai-Jin Xiao, Xiao-Jing Zhao, Zhao-Jun Chu, Han-Xu, Guo-Qing Liu, Cheng-Zhi Huang, Li Zhang, New off-on sensor for captopril sensing based on photoluminescent MoO<sub>x</sub> quantum dots, ACS Omega 2017, 2, 1666-1671.
6. Xiao-Hua Jiang, Dong-Miao Qin, Gui-Chun Mo, Jin-Su Feng, Xiang-Fei Zheng, Bi-Yang Deng, Facile preparation of boron and nitrogen co-doped green emission carbon quantum dots for detection of permanganate and captopril, Analytical Chemistry, 2019, 91, 11455-11460.
